# Supplementary material
Source: Copernicus journal article supplement (doi:10.5194/essd-2026-279)
Supplement: Supplementary file 1 [file essd-2026-279-supplement.pdf]

*Supplement of*

# **GRIT-ADB: A Global Attribute Database for the GRIT Hydrography**

**Boen Zhang et al.**

*Correspondence to:* Boen Zhang (boen.zhang@ouce.ox.ac.uk) and Louise Slater (louise.slater@ouce.ox.ac.uk)

The copyright of individual parts of the supplement might differ from the article licence.

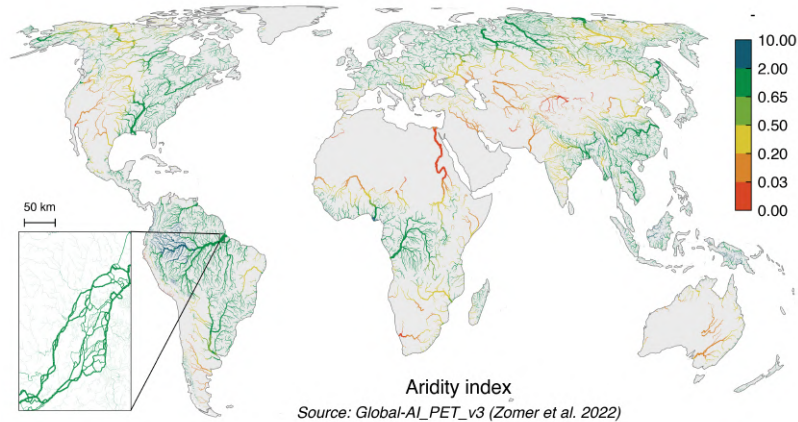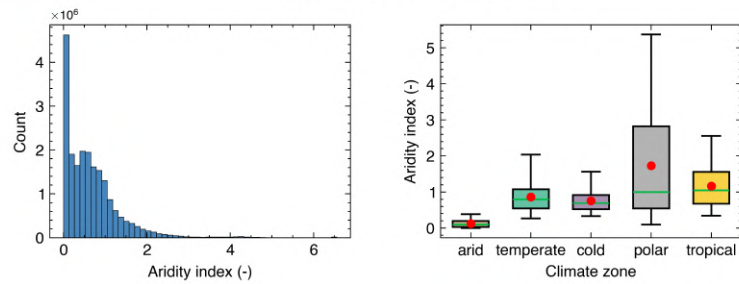

**Figure S1.** Aridity index in GRIT-ADB. The histogram presents the frequency distribution of Aridity index. Boxplots present the variability of Aridity index across five climate regions. The whiskers extend to the 2.5th and 97.5th percentiles.

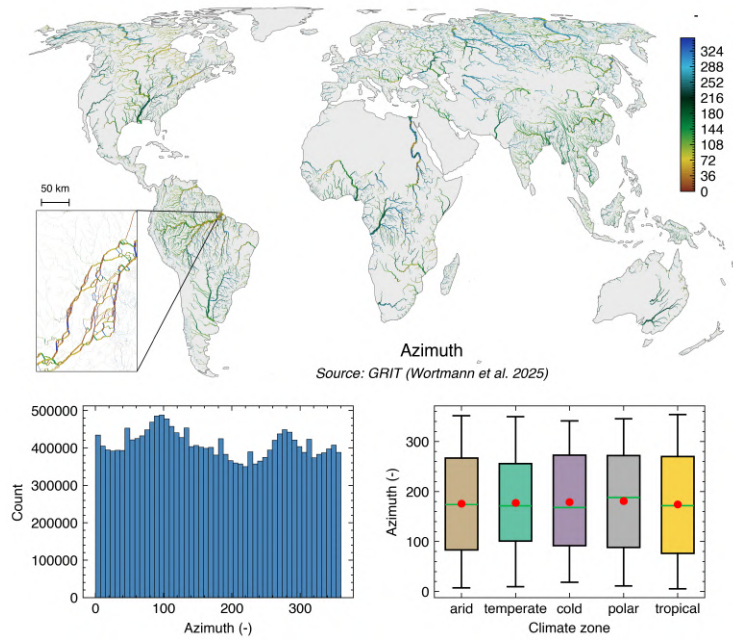

**Figure S2.** Same as Figure S1 but shown for azimuth.

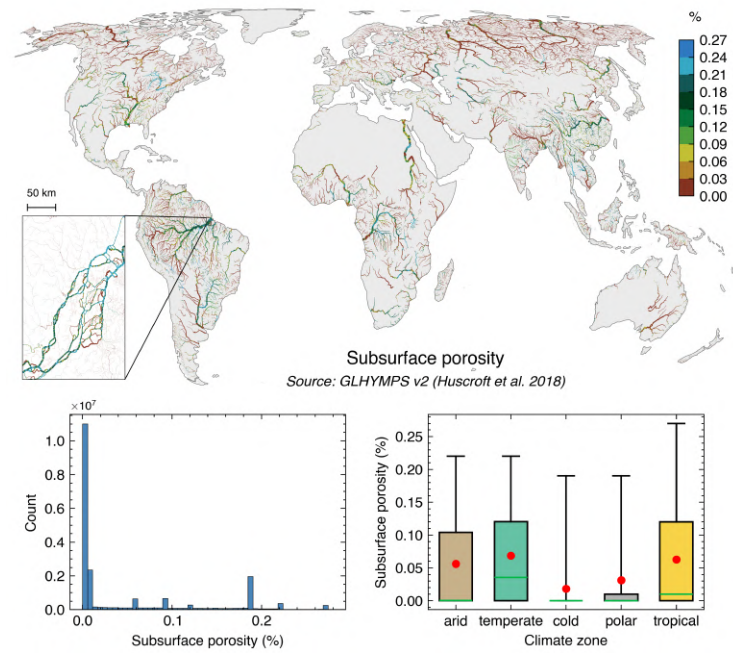

**Figure S3.** Same as Figure S1 but shown for subsurface porosity.

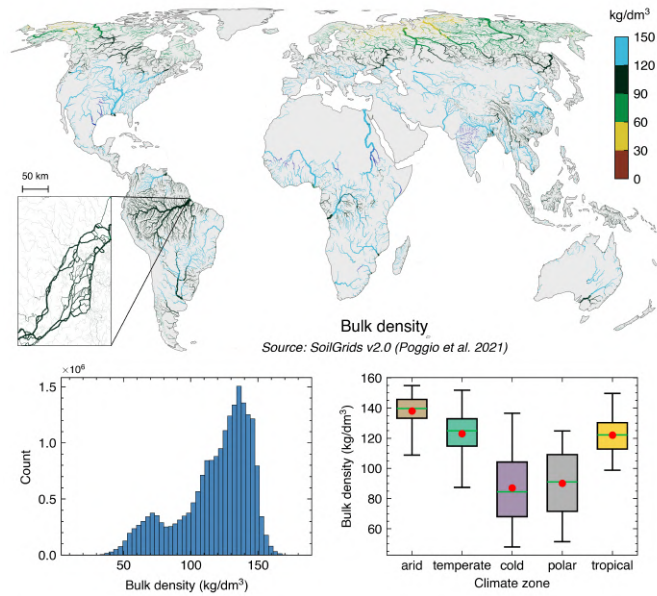

**Figure S4.** Same as Figure S1 but shown for bulk density.

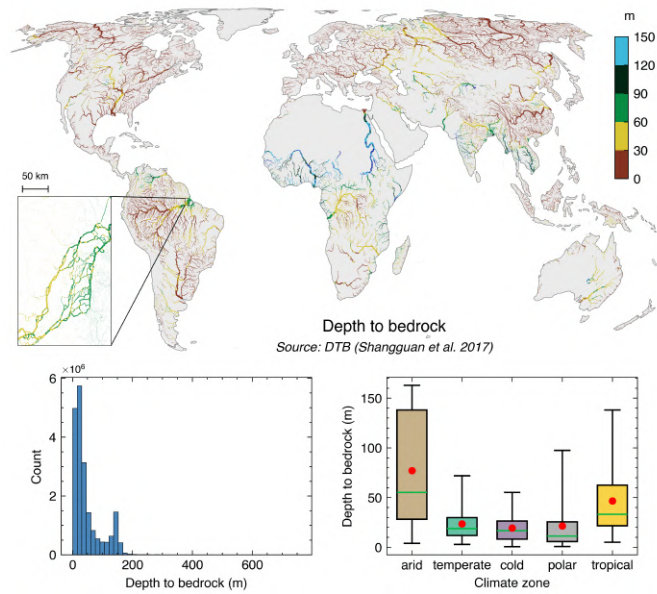

**Figure S5.** Same as Figure S1 but shown for depth to bedrock.

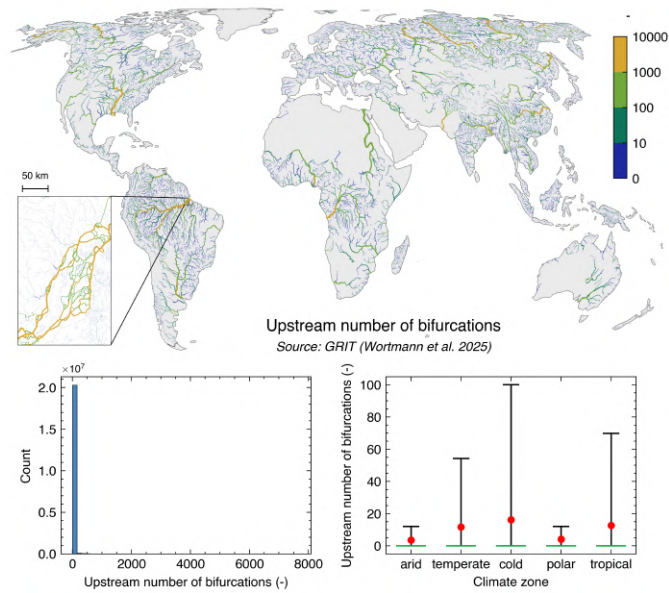

**Figure S6.** Same as Figure S1 but shown for upstream number of bifurcations.

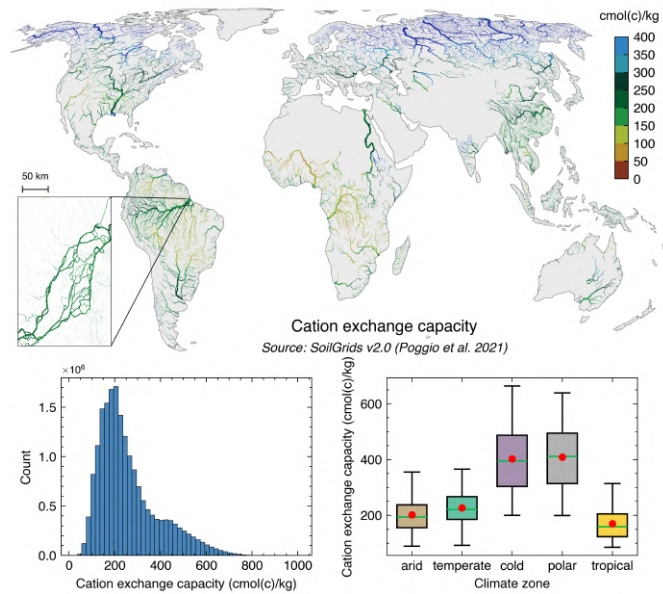

**Figure S7.** Same as Figure S1 but shown for cation exchange capacity.

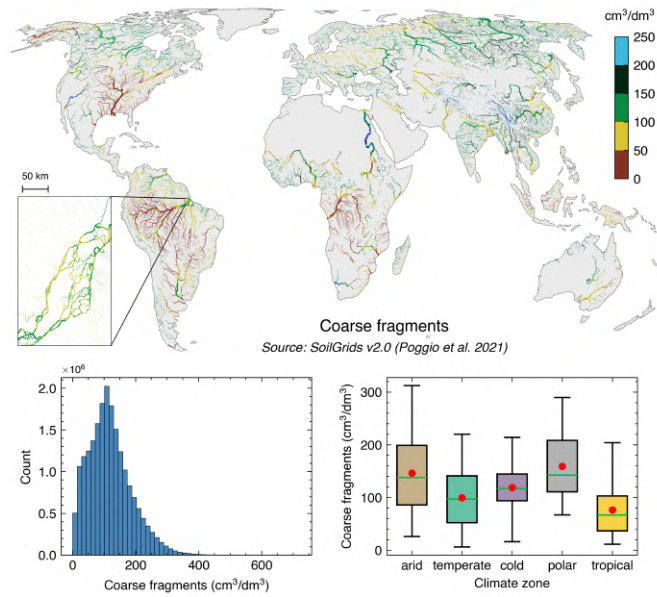

Figure S8. Same as Figure S1 but shown for coarse fragments.

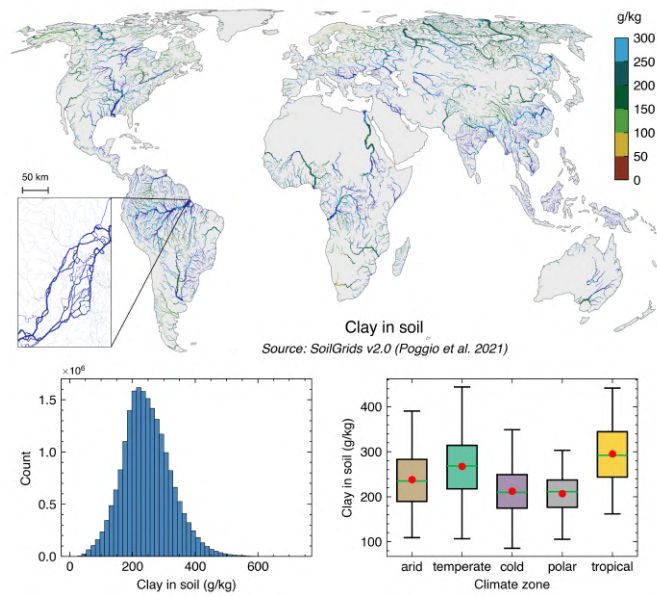

Figure S9. Same as Figure S1 but shown for clay in soil.

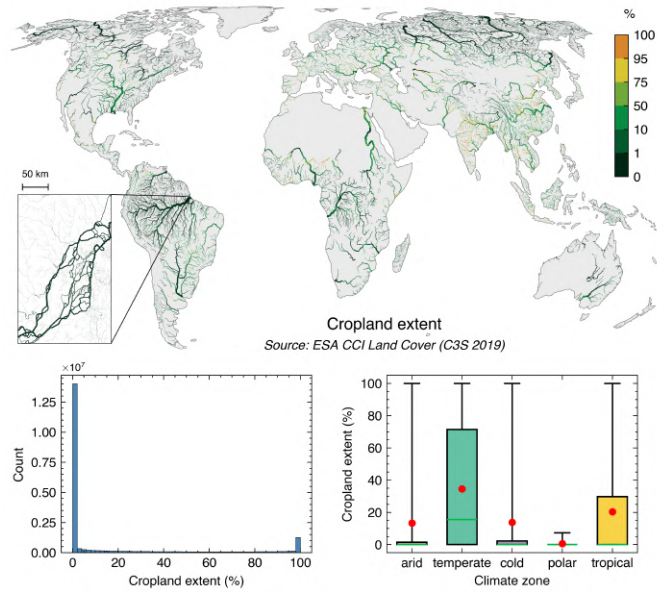

**Figure S10.** Same as Figure S1 but shown for cropland extent.

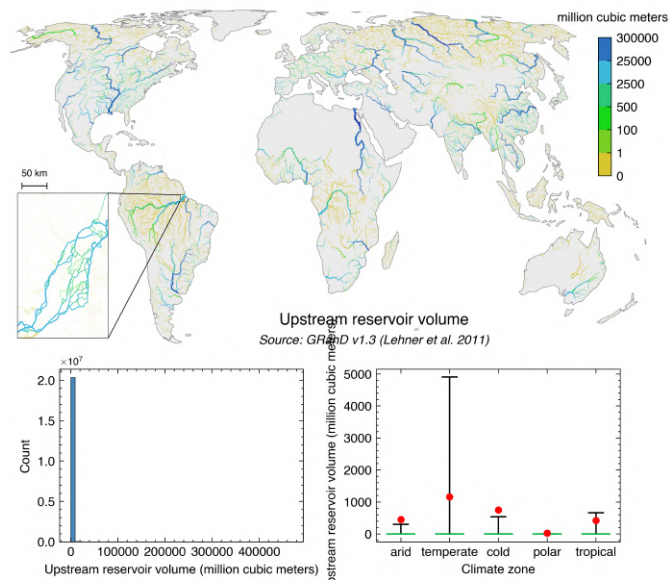

**Figure S11.** Same as Figure S1 but shown for upstream reservoir volume.

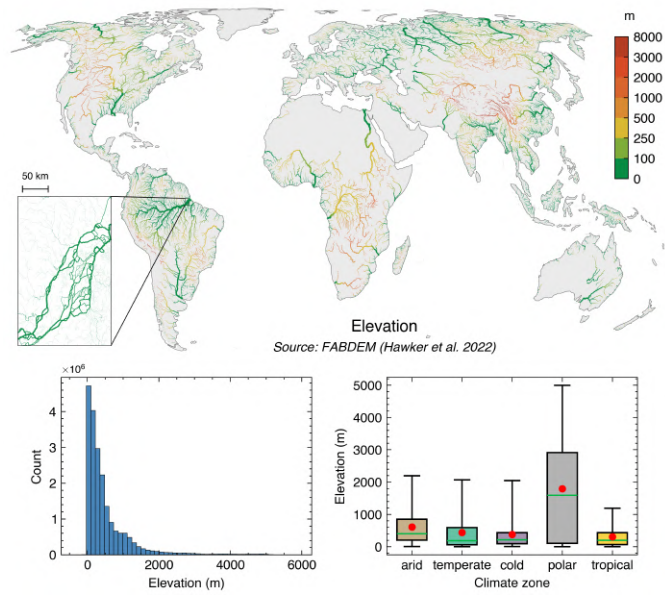

**Figure S12.** Same as Figure S1 but shown for elevation.

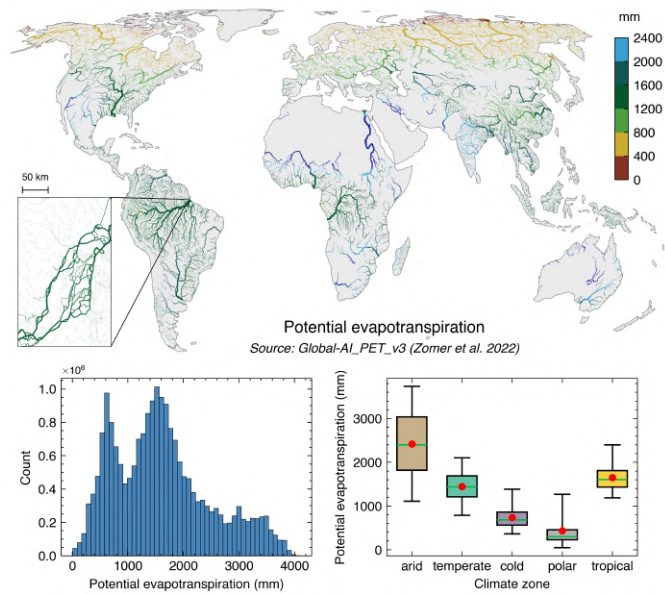

**Figure S13.** Same as Figure S1 but shown for potential evapotranspiration.

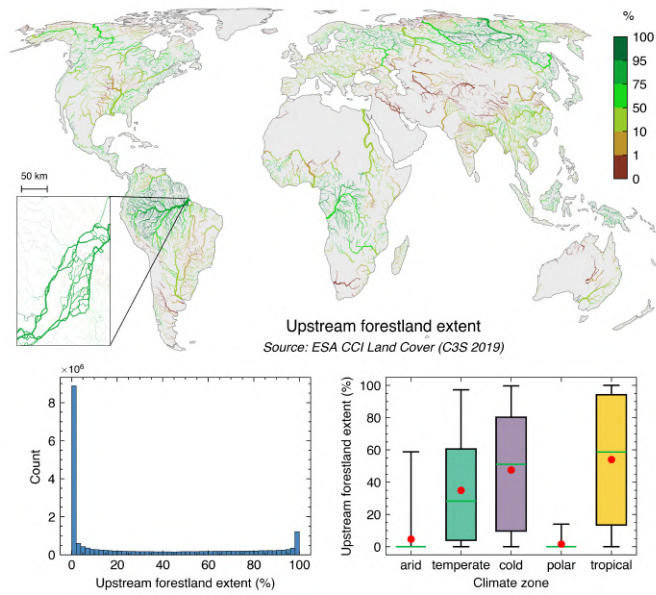

**Figure S14.** Same as Figure S1 but shown for upstream forestland extent.

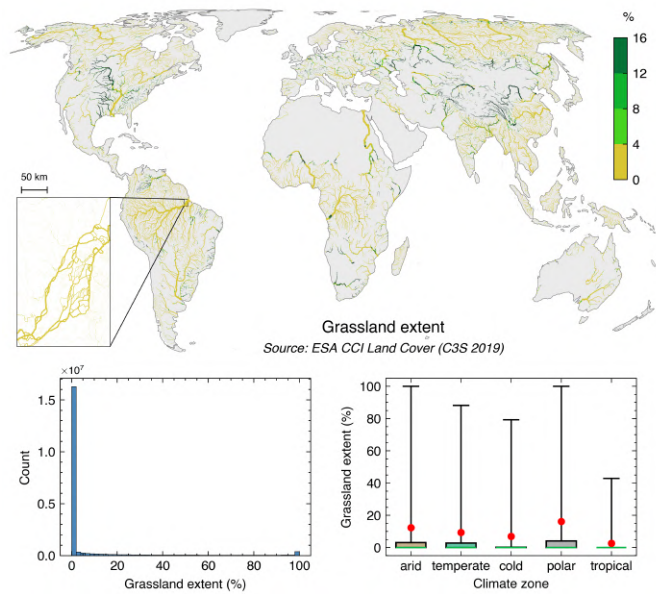

**Figure S15.** Same as Figure S1 but shown for grassland extent.

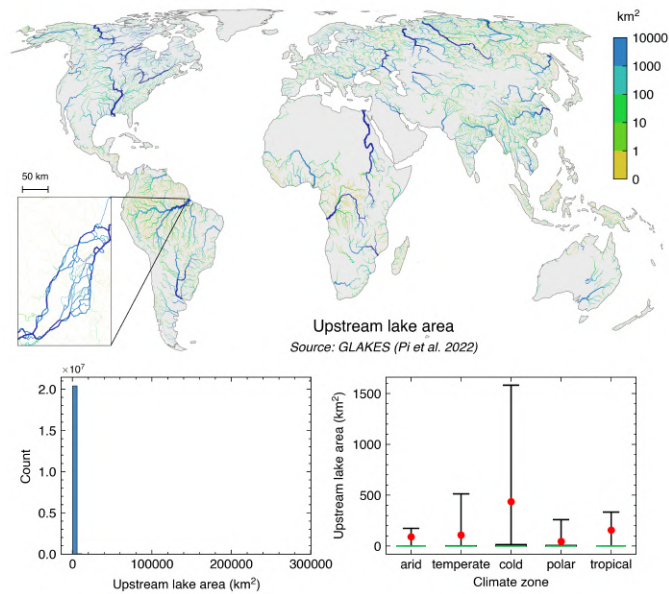

**Figure S16.** Same as Figure S1 but shown for upstream lake area.

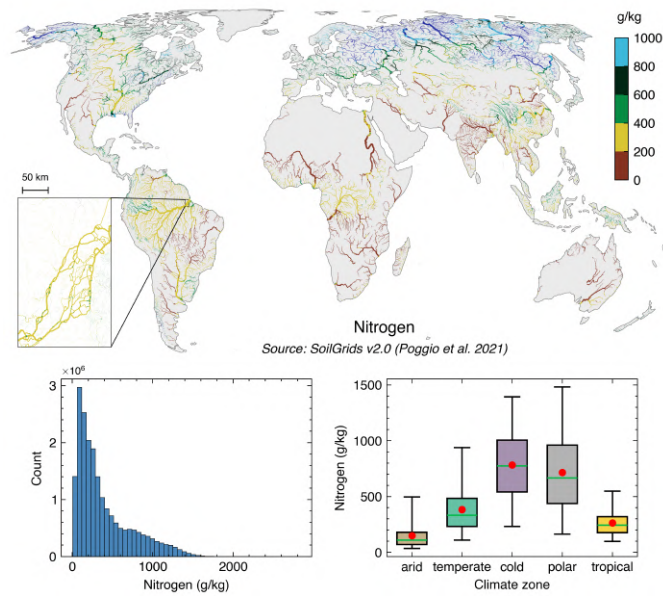

**Figure S17.** Same as Figure S1 but shown for Nitrogen.

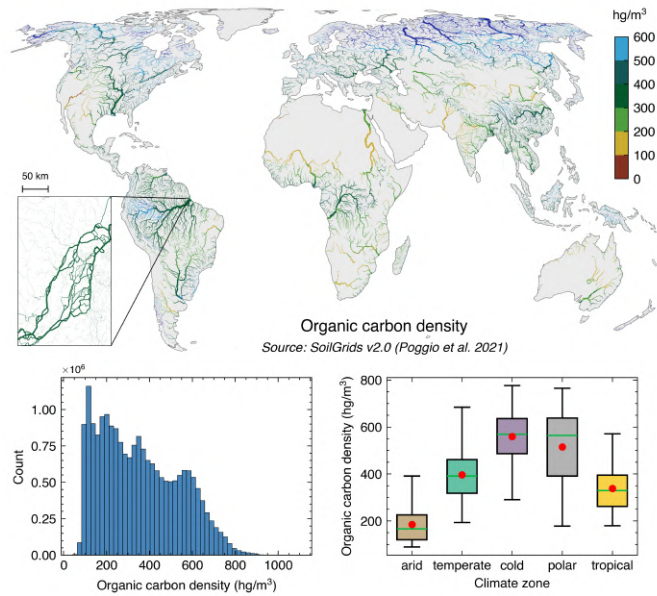

Figure S18. Same as Figure S1 but shown for organic carbon density.

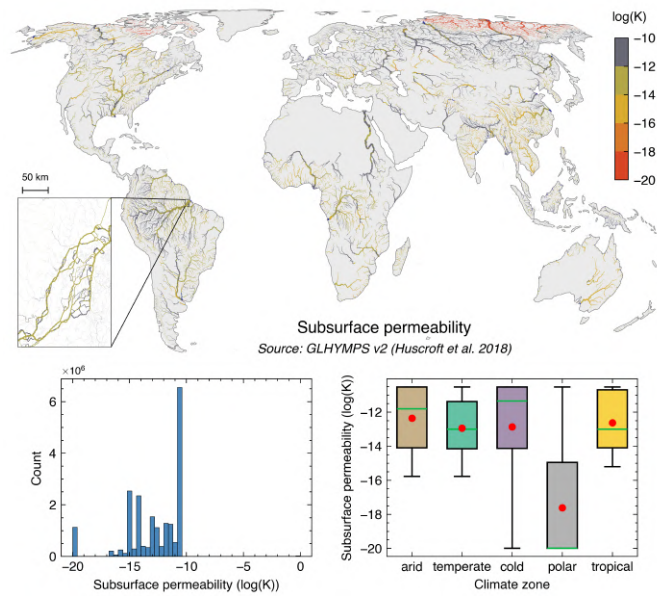

Figure S19. Same as Figure S1 but shown for subsurface permeability.

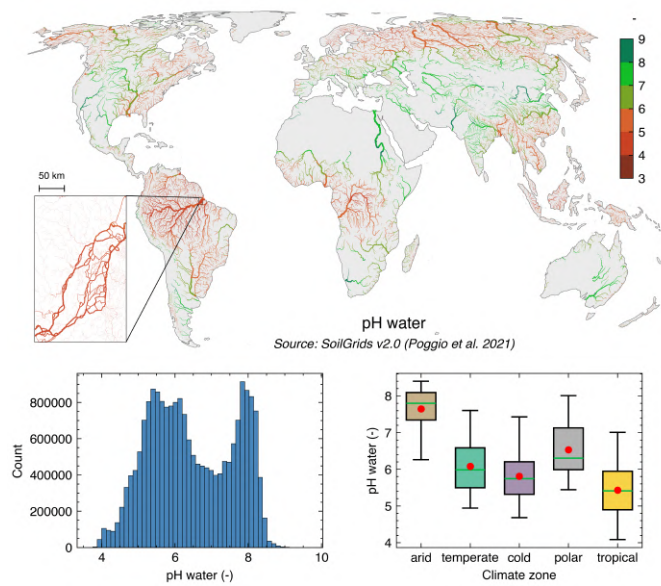

**Figure S20.** Same as Figure S1 but shown for pH of water.

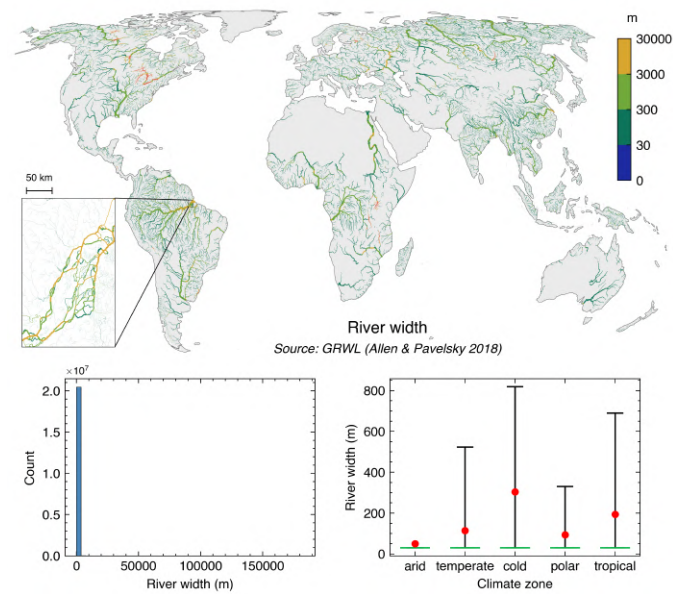

**Figure S21.** Same as Figure S1 but shown for river width from the GRWL dataset.

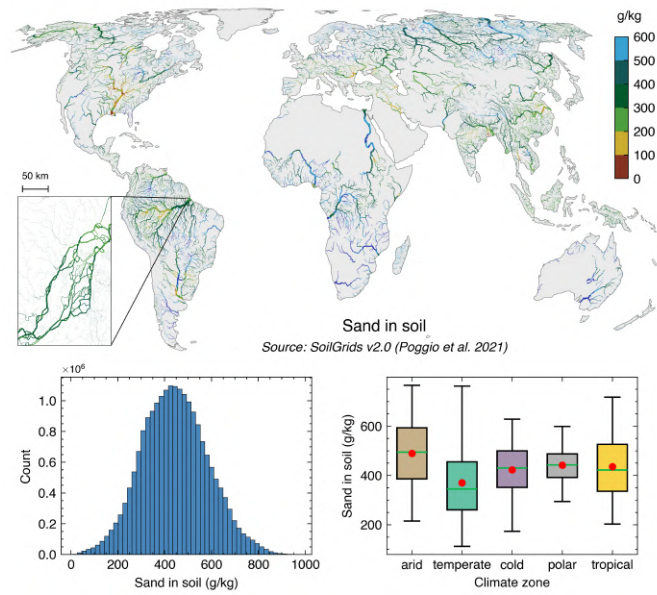

**Figure S22.** Same as Figure S1 but shown for sand in soil.

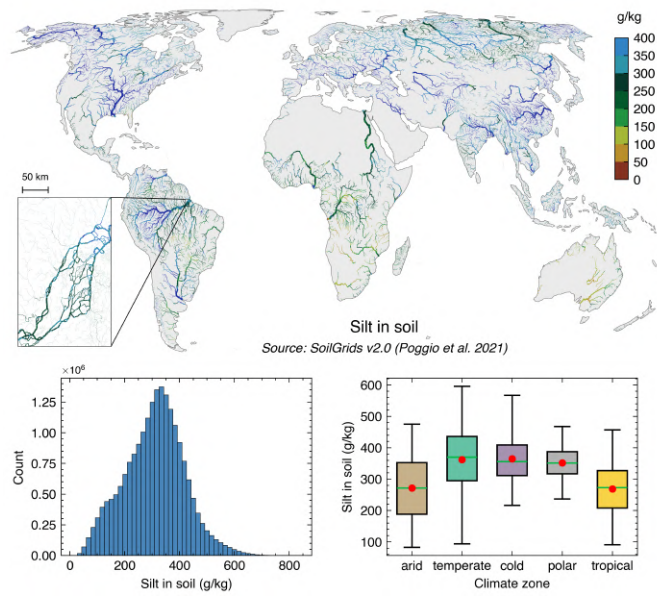

**Figure S23.** Same as Figure S1 but shown for silt in soil.

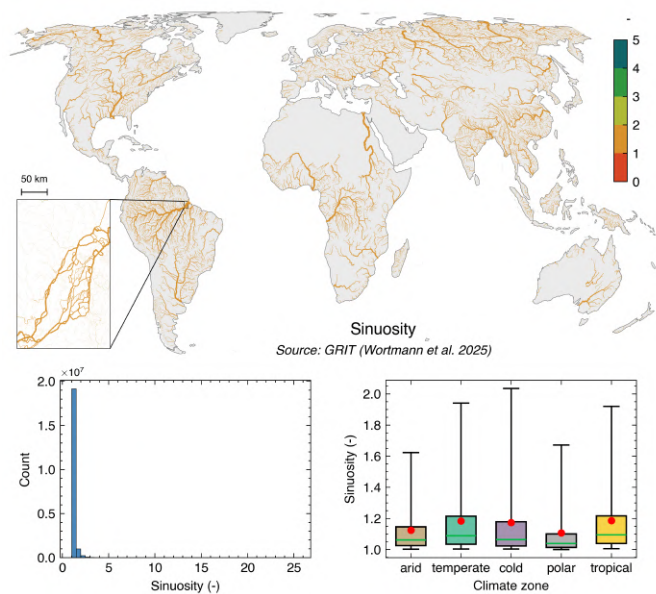

**Figure S24.** Same as Figure S1 but shown for sinuosity.

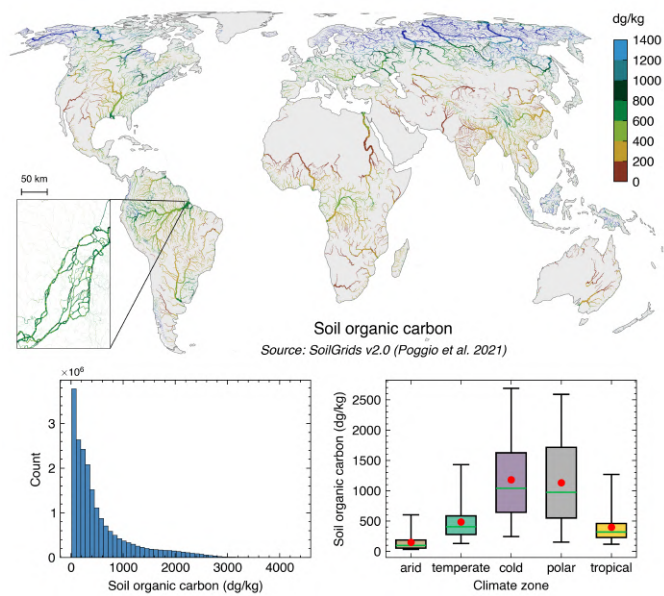

**Figure S25.** Same as Figure S1 but shown for soil organic carbon.

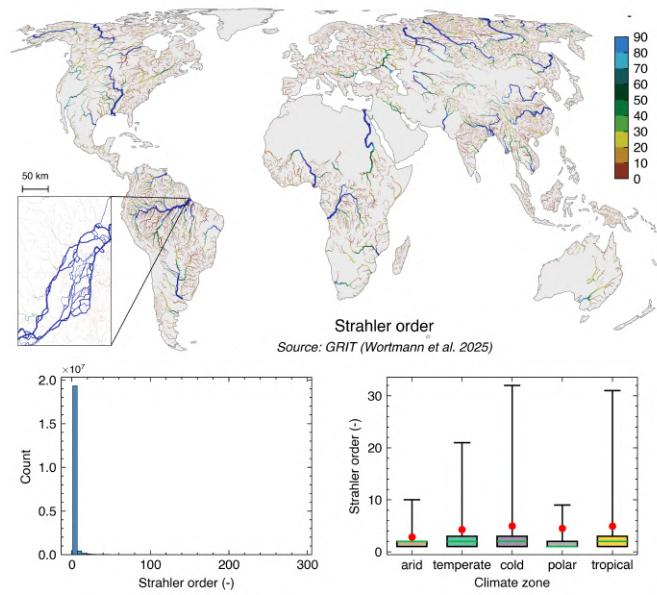

**Figure S26.** Same as Figure S1 but shown for Strahler order.

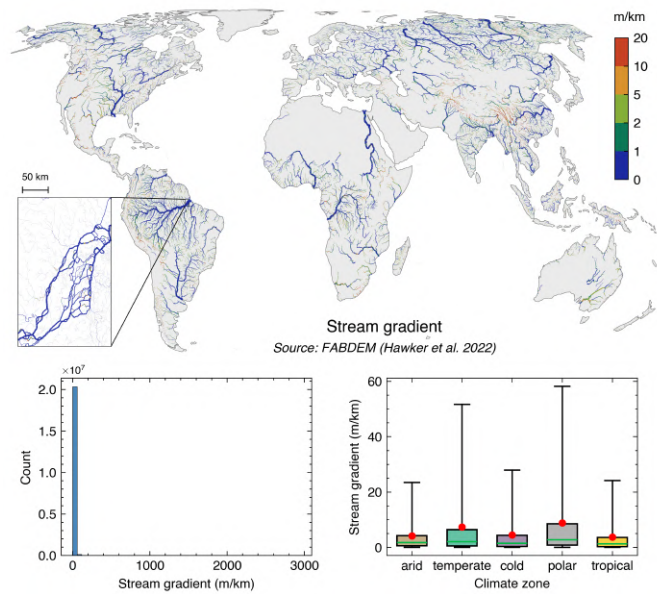

**Figure S27.** Same as Figure S1 but shown for stream gradient.

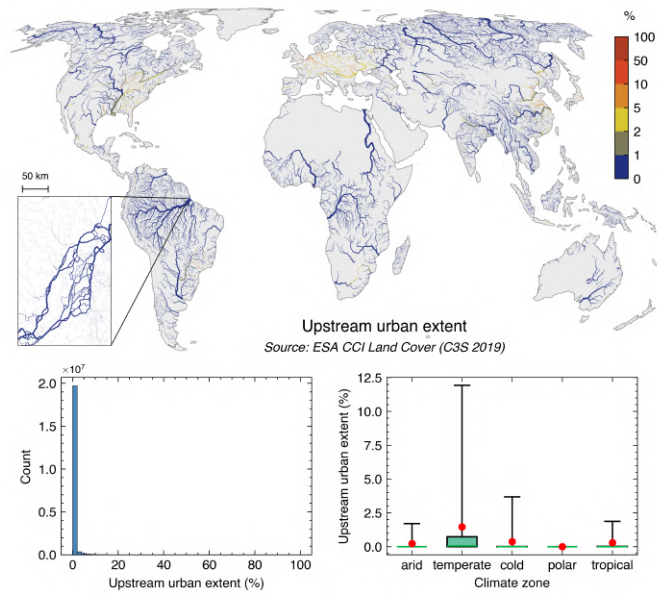

**Figure S28.** Same as Figure S1 but shown for upstream urban extent.

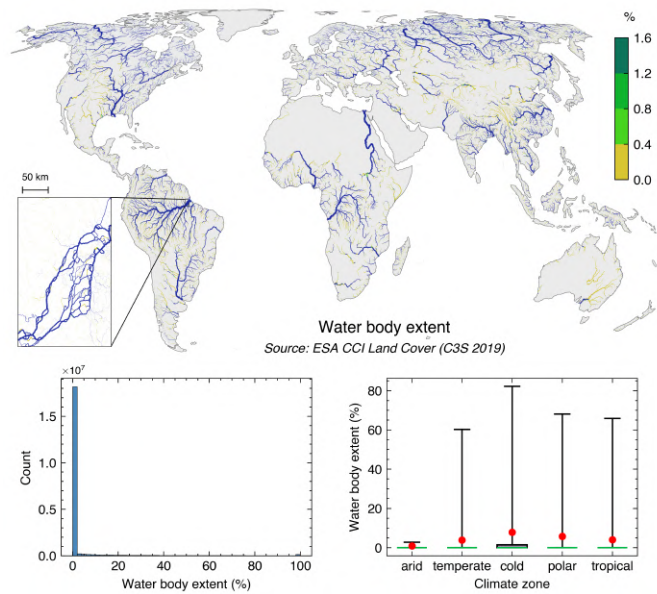

**Figure S29.** Same as Figure S1 but shown for water body extent.
